# Supplementary material
Source: Research Square preprint supplement (doi:10.21203/rs.3.rs-8426909/v1)
Supplement: Supplementary file 1 [file 3cdde0b50f38946a90f0f5e7.docx]

Eric Atta Quainoo1 Joana Bortey2, Abraham Gyamfi3, Grace Aba Mensah1, Grace Yeboah3, Kennedy Ameyaw Baah4, Daniel Mensah Ofori5, Zakaria Wanzam Abubakari6

1Department of Education, Wesley College of Education, Kumasi, Ghana

2Department of Education, Kibi Presbyterian College of Education, Kibi, Ghana

3Department of Interdisciplinary Studies, AAMUSTED, Kumasi, Ghana

4Department of Science, Wesley College of Education, Kumasi, Ghana

5Department of Education Studies, Akrokerri College of Education, Akrokerri, Ghana

6Registry, Wesley College of Education, Kumasi, Ghana

Correspondence concerning this article should be addressed to

Eric Atta Quainoo

Department of Education, Wesley College of Education, Kumasi, Ghana

Email: [eric@wesco.edu.gh](mailto:eric@wesco.edu.gh)

Phone Number: +233240668579

**Author contribution**

Eric Atta Quainoo: Conceptualization; writing—original draft; writing ‐ review & editing

Joana Bortey: Introduction; writing—original draft, writing ‐ review & editing

Abraham Gyamfi: Introduction; writing ‐ review & editing

Grace Aba Mensah: Methodology; writing ‐ review & editing

Grace Yeboah: Methodology; writing ‐ review & editing

Kennedy Ameyaw Baah: Data collection and analysis; writing ‐ review & editing

Daniel Mensah Ofori: Data collection and analysis; writing ‐ review & editing

Zakaria Wanzam Abubakari: Data collection and analysis; writing ‐ review & editing

**EMAIL and ORCID**

Eric Atta Quainoo; [eric@wesco.edu.gh](mailto:eric@wesco.edu.gh) <https://orcid.org/0000-0002-3133-1780>

Joana Bortey; [borteybea@gmail.com](mailto:borteybea@gmail.com) <https://orcid.org/0009-0007-8543-3161>

Abraham Gyamfi; [agyamfi@aamusted.edu.gh](mailto:agyamfi@aamusted.edu.gh) <https://orcid.org/0000-0002-3189-1825>

Grace Aba Mensah; [graceabamensah@wesco.edu.gh](mailto:graceabamensah@wesco.edu.gh) <https://orcid.org/0000-0002-7116-2803>

Grace Yeboah; [graceyeboah@aamusted.edu.gh](mailto:graceyeboah@aamusted.edu.gh) <https://orcid.org/0000-0002-2492-9522>

Kennedy Ameyaw Baah; [kabaah@wesco.edu.gh](mailto:kabaah@wesco.edu.gh) <https://orcid.org/0000-0001-6820-3902>

Daniel Mensah Ofori; [danoforim@arce.edu.gh](mailto:danoforim@arce.edu.gh) <https://orcid.org/0009-0002-1832-6079>

Zakaria Wanzam Abubakari; [wanzam@wesco.edu.gh](mailto:wanzam@wesco.edu.gh) <https://orcid.org/0009-0004-5238-8016>

**Author biography**

**Eric Atta Quainoo** is a lecturer and head of languages department at Wesley College of Education with expertise in measurement and evaluation, teacher education, educational leadership, and psychology. He holds a Ph.D. in Education and a Master of Arts in Educational Leadership and Policy from Beijing Normal University, building on earlier degrees in Measurement and Evaluation and Psychology from the University of Cape Coast. His research and publications focus on educational assessment practices, emergency remote teaching, teacher education, student experiences, and digital learning platforms. Eric advocates for fair, reliable, and contextually relevant assessment practices that promote equity, support learner growth, and inform teaching.

**Joana Bortey** is a Ph.D. candidate at the University of Cape Coast, Ghana, and a lecturer in the Department of Education Studies at Kibi Presbyterian College of Education. Her research interests center on educational assessment, measurement, and the application of statistics in education, with a focus on improving learning outcomes and evidence-based decision-making in teaching and learning. She has experience in training pre-service teachers, conducting classroom-based research, and supporting curriculum implementation. Joana is passionate about bridging the gap between assessment research and practice, particularly in foundational literacy and numeracy education within Ghana’s basic education system.

**Abraham Gyamfi** is a lecturer in the Department of Interdisciplinary Studies at Akenten Appiah-Menka University of Skills Training and Entrepreneurial Development, Kumasi, Ghana. With over 20 years of teaching experience and 9 years in research, he has published more than 30 articles in both local and international journals. His area of specialization is measurement and evaluation, with research interests spanning classroom assessment, teacher development, evaluation, and pedagogy. Through his work, he seeks to advance effective teaching and assessment practices that promote learning outcomes and professional growth among teachers, contributing significantly to Ghana’s education sector and beyond.

**Grace Aba Mensah** is a lecturer and the acting Vice Principal of Wesley College of Education, Kumasi, Ghana. She holds a PhD, M.Ed., and B.Ed. in Guidance and Counselling and Psychology from the University of Cape Coast. Her areas of specialization are Guidance and Counselling and Psychology, with research interests in teacher education, stress management, behaviour modification, and mental health and wellbeing. She teaches courses in Guidance and Counselling, Differentiated Planning, Learning, and Multimedia Development. Passionate about youth and children, Grace Aba Mensah is committed to supporting their personal growth, helping them realise their potential through education and counselling.

**Grace Yeboah** is a teacher educator, licensed counselling psychologist, and lecturer with over three decades of experience across all levels of education. She lectures at the Akenten Appiah-Menka University of Skills Training and Entrepreneurial Development, teaching Guidance and Counselling and Educational Psychology, while also providing counselling services to students, faculty, and the wider community. Having pursued her tertiary education at the University of Cape Coast, she has built expertise in behaviour modification, counselling, marriage, and teacher education. Her scholarly contributions include two conference papers and fourteen peer-reviewed journal articles, reflecting her commitment to empowerment through education and psychological support.

**Kennedy Ameyaw Baah** is the Principal of Wesley College of Education, Kumasi, Ghana. He holds a PhD in Chemistry, an MPhil in Organic and Natural Products, and an M.Ed. in Science Education. His specialization is in chemistry, with research interests spanning phytochemistry, natural products, organic chemistry, science education, and teacher professional development. With extensive experience in higher education leadership, Kennedy Ameyaw Baah has contributed to curriculum reform, teacher training, and research advancement in Ghana’s Colleges of Education. He is dedicated to mentoring the next generation of educators and researchers, fostering innovation in science teaching, and advancing evidence-based teacher education.

**Daniel Mensah Ofori** is an educational psychologist and Head of the Department of Education Studies at Akrokerri College of Education. With over a decade of experience in Ghana’s education sector, he combines teaching, leadership, and research in teacher preparation. He holds bachelor’s and master’s degrees in Educational Psychology from the University of Cape Coast, where he is pursuing a PhD. His research explores student behaviour, classroom dynamics, and educational leadership, with several publications in these areas. Guided by the principle that no child should be left behind, he advocates for research-based interventions and holistic psychological support in education.

**Zakaria Wanzam Abubakari** is the Acting Head of Human Resources at Wesley College of Education, Kumasi, with expertise in human resource management, organizational behaviour, and institutional governance. He holds an MBA in Human Resource and Organizational Behaviour from Akenten Appiah-Menka University of Skills Training and Entrepreneurial Development and a Bachelor of Management Studies from the University of Cape Coast. Currently pursuing an LLB at Wisconsin International University College, he is strengthening his expertise in educational and labour law. His combined training in management, HR, and law enables him to contribute significantly to policy development, institutional governance, and staff welfare.
